# Supplementary material for: Chronic Pesticide Exposure in Farm Workers Is Associated with the Epigenetic Modulation of hsa-miR-199a-5p
Source: MDPI journal article supplement (doi:10.3390/ijerph19127018), 2022-06-08
Supplement: s1 [file s1]

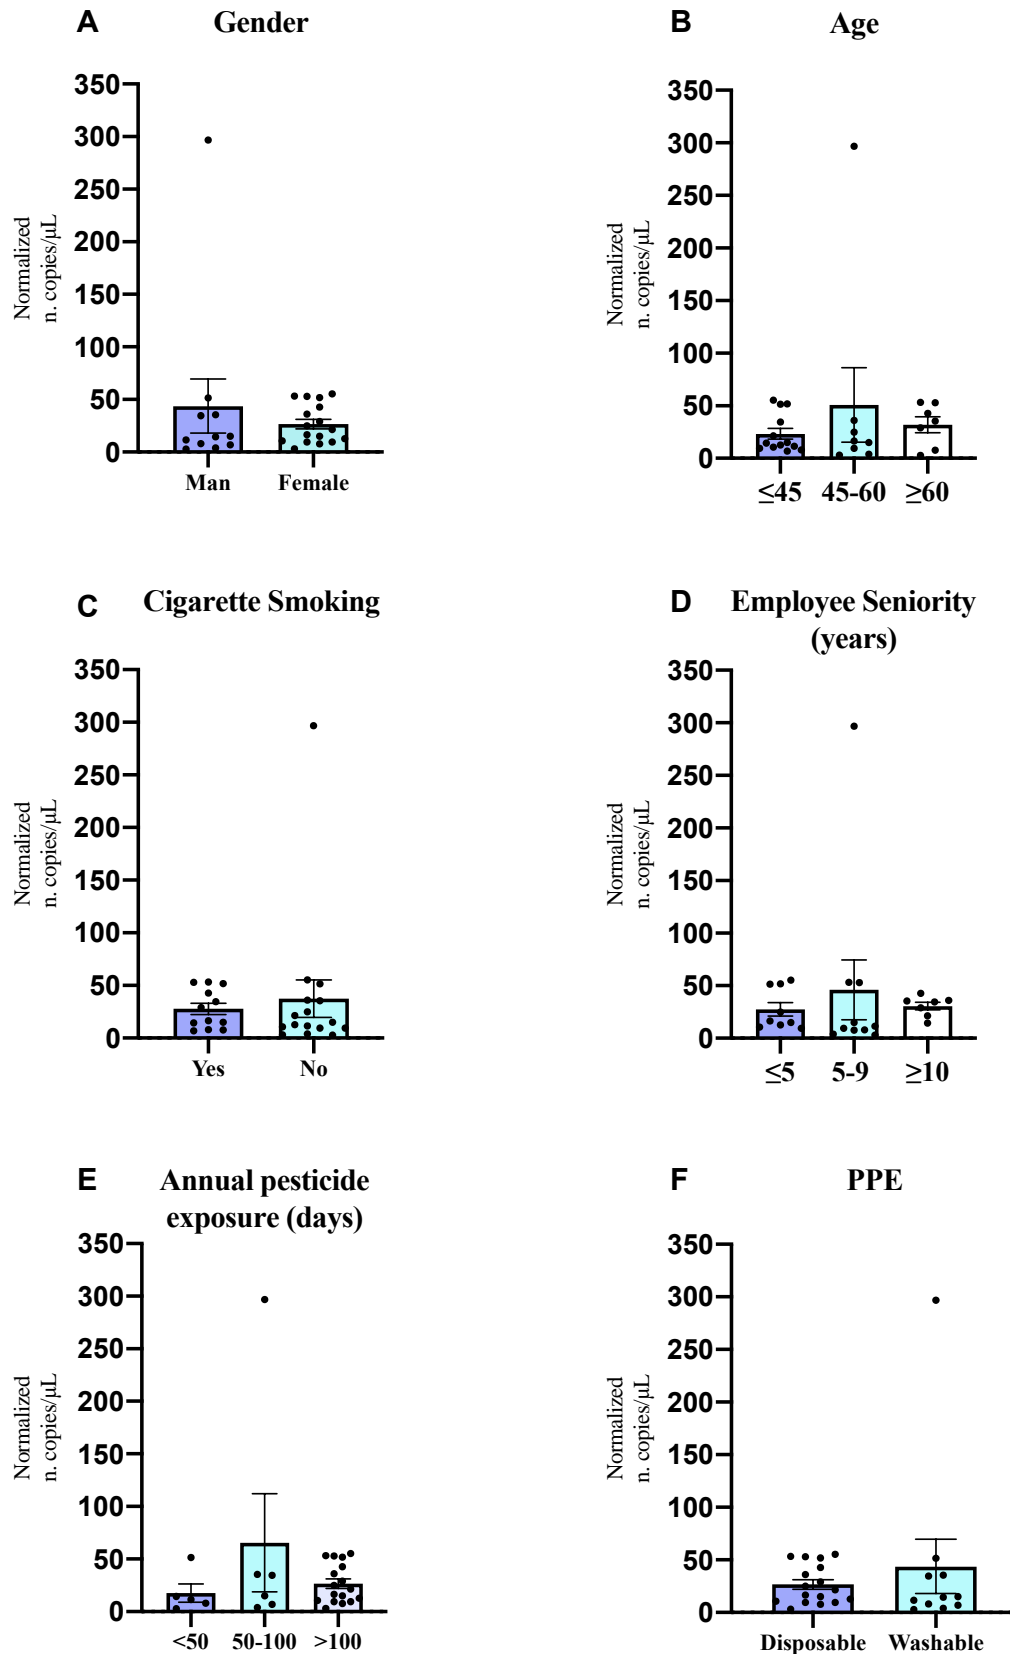

**Supplementary Figure S1.** Analysis of hsa-miR-199a-5p expression levels in farm workers stratified according different characteristics. (A) Stratification by gender (Mann-Whitney test); (B) Stratification by age (Mann-Whitney test); (C) Stratification by cigarette smoking (Mann-Whitney test); (D) Stratification by employee seniority (Kruskal-Wallis test); (E) Stratification by annual pesticide exposure (Kruskal-Wallis test); (F) Stratification by use of PPE (Mann-Whitney test). No significant data were obtained.

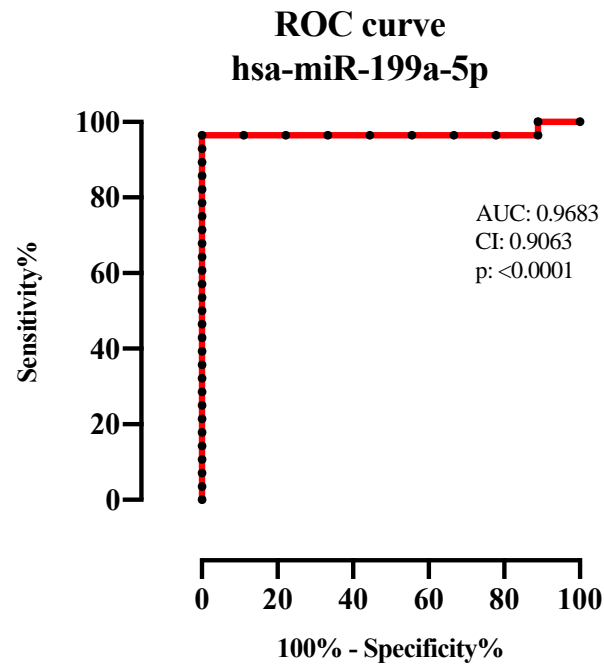

**Supplementary Figure S2.** ROC analysis demonstrated the high diagnostic value of hsa-miR-199a-5p (96.43% sensitivity and 100% specificity).
